# Supplementary material
Source: PubMed Central journal article supplement (PMC6239169)
Supplement: NIHMS970131-supplement-esi.pdf [file NIHMS970131-supplement-esi.pdf]

## Reactive oxygen species generation is likely a driver of copper-based nanomaterial toxicity

Lindsay Denluck<sup>1</sup>, Fan Wu<sup>2</sup>, Lauren E. Crandon<sup>2</sup>, Bryan J. Harper<sup>1</sup>, and Stacey L. Harper<sup>1,2,3\*</sup>

<sup>1</sup>Department of Environmental and Molecular Toxicology, Oregon State University, Corvallis OR, United States; <sup>2</sup>School of Chemical, Biological, and Environmental Engineering, Oregon State University, Corvallis OR, United States; <sup>3</sup>Oregon Nanoscience and Microtechnologies Institute, Eugene OR, United States

\*Corresponding author. Email address: [stacey.harper@oregonstate.edu](mailto:stacey.harper@oregonstate.edu)

**Supporting Information:**

**7 pages, 2 tables, 3 figures**

Figure S1. Hatching success of chorion intact embryonic zebrafish as assessed at 120 hpf.

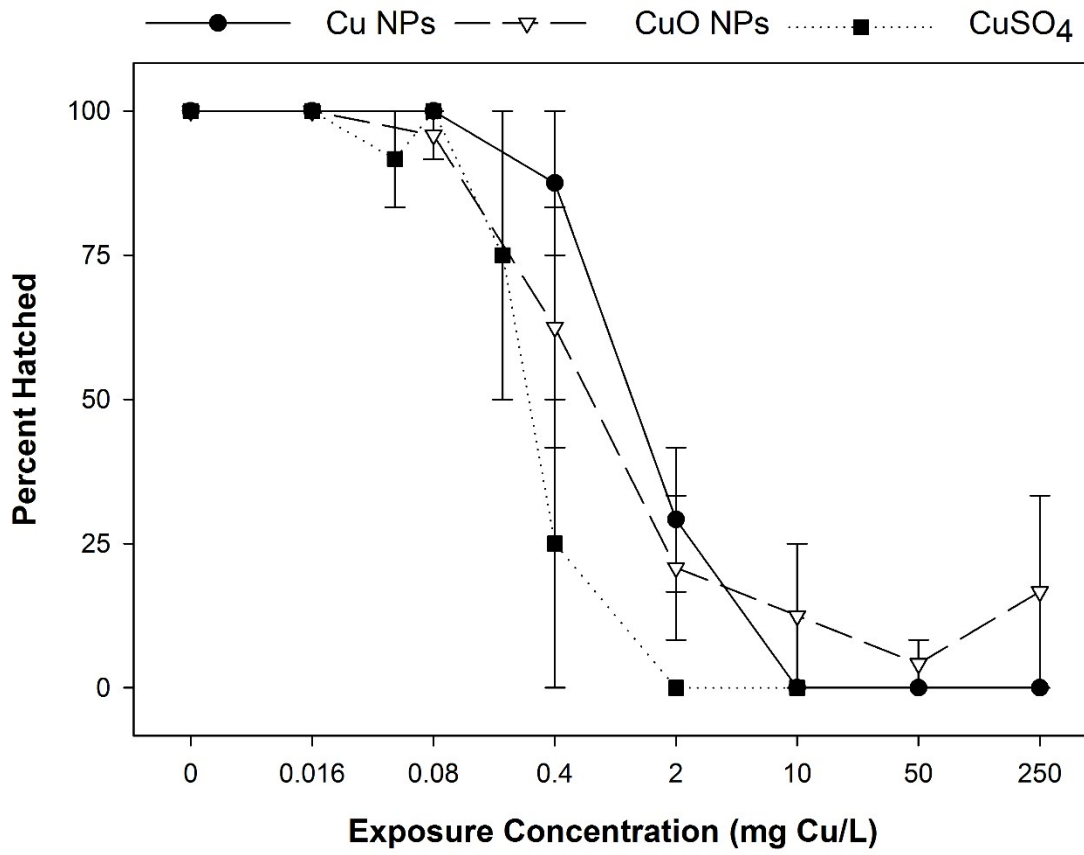

**Figure S2.** Representative image of significant malformations observed in 120 hpf zebrafish.

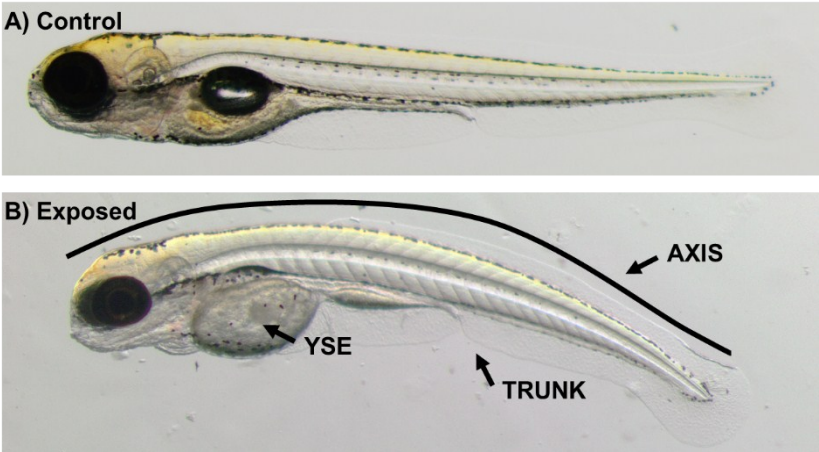

**Figure S3.** Calculated EZ Metric values for each type of Cu exposure and both chorion statuses.

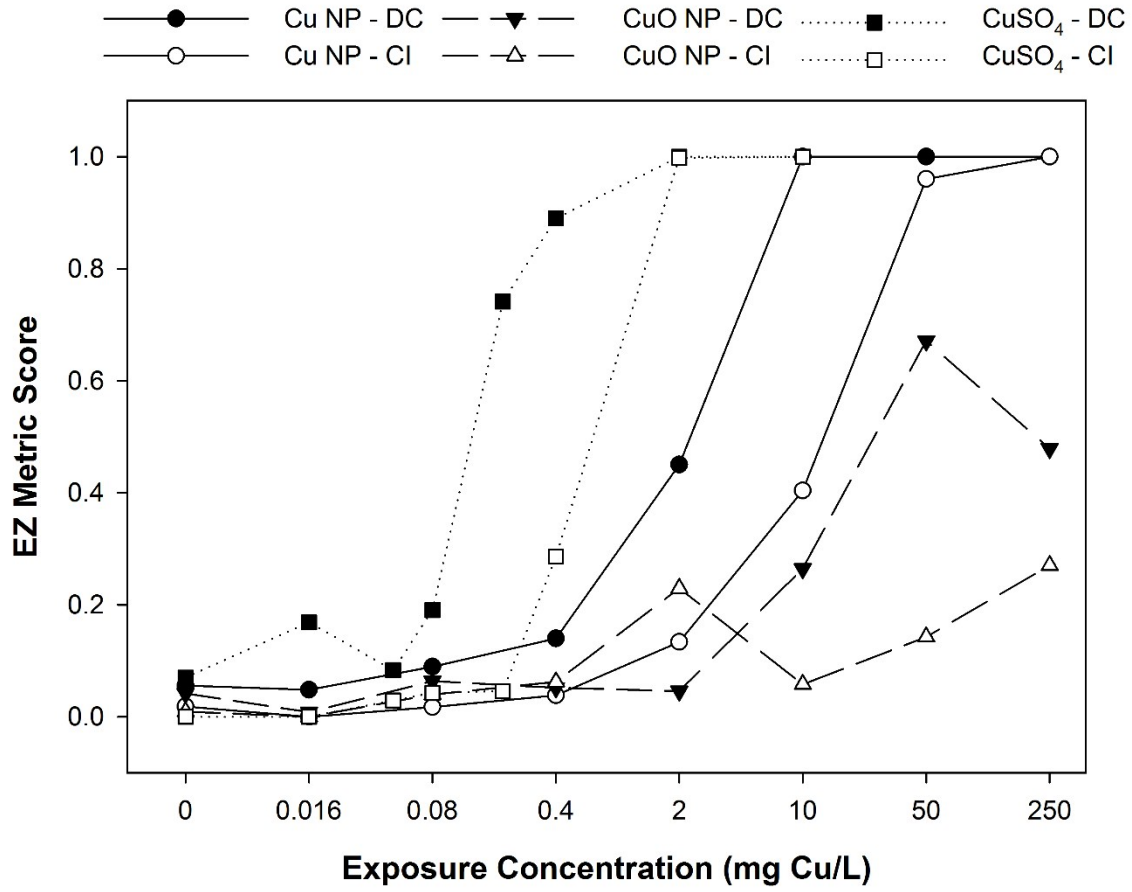

**Table S1.** Reported values for measuring zeta potential per Lowry *et al.* 2016.<sup>1</sup>

|                                           | <b>Cu NPs</b>                                                                                                                                                                                                                                                                    | <b>CuO NPs</b>            |
|-------------------------------------------|----------------------------------------------------------------------------------------------------------------------------------------------------------------------------------------------------------------------------------------------------------------------------------|---------------------------|
| Electrophoretic Mobility                  | -1.508 $\mu\text{mcm/Vs}$                                                                                                                                                                                                                                                        | -1.854 $\mu\text{mcm/Vs}$ |
| <b>Particle Properties</b>                |                                                                                                                                                                                                                                                                                  |                           |
| Size Distribution                         | See Figure 1                                                                                                                                                                                                                                                                     | See Figure 1              |
| Composition                               | Cu core with 1.4 nm CuO shell                                                                                                                                                                                                                                                    | CuO                       |
| Surface Functionalization                 | None                                                                                                                                                                                                                                                                             | None                      |
| Shape                                     | Spherical                                                                                                                                                                                                                                                                        | Spherical                 |
| Model used to compute zeta-potential      | Smoluchowski                                                                                                                                                                                                                                                                     | Smoluchowski              |
| <b>Media Dependent Factors</b>            |                                                                                                                                                                                                                                                                                  |                           |
| pH                                        | 7.2                                                                                                                                                                                                                                                                              | 7.2                       |
| Specific conductance                      | 0.482 mS/cm                                                                                                                                                                                                                                                                      | 0.477 mS/cm               |
| Ionic Composition                         | 2.8 mg/L Na <sup>+</sup> , 0.10 mg/L K <sup>+</sup> , 0.33 mg/L Mg <sup>2+</sup> , 0.11 mg/L Ca <sup>2+</sup> , 0.0020 mg/L Sr <sup>+</sup> , 4.9 mg/L Cl <sup>-</sup> , 0.70 mg/L SO <sub>4</sub> <sup>2-</sup><br>(values derived from Atkinson and Bingman 1997) <sup>2</sup> |                           |
| Ionic Strength                            | 0.18 mM                                                                                                                                                                                                                                                                          | 0.18 mM                   |
| Macromolecules/NOM present                | None                                                                                                                                                                                                                                                                             | None                      |
| Temperature                               | 26.7 C                                                                                                                                                                                                                                                                           | 26.7 C                    |
| Viscosity                                 | 0.8508                                                                                                                                                                                                                                                                           | 0.8508                    |
| Particle Concentration                    | 10 mg Cu/L                                                                                                                                                                                                                                                                       | 10 mg Cu/L                |
| <b>Measurement Parameters</b>             |                                                                                                                                                                                                                                                                                  |                           |
| Applied voltage                           | 148 V                                                                                                                                                                                                                                                                            | 148 V                     |
| Number of measurements made and averaged  | 12                                                                                                                                                                                                                                                                               | 12                        |
| Total number of replicate measurements    | 3                                                                                                                                                                                                                                                                                | 3                         |
| Observed trends in replicate measurements | None                                                                                                                                                                                                                                                                             | None                      |

**Table S2.** Summary of hydrodynamic diameter and zeta potential values obtained over time in FW, represented graphically in Figure 1. Error represents standard error of two measurements.

|              | Hydrodynamic Diameter (nm) |             | Zeta Potential (mV) |         |
|--------------|----------------------------|-------------|---------------------|---------|
|              | Cu NP                      | CuO NP      | Cu NP               | CuO NP  |
| <b>Day 0</b> | 643 ± 342                  | 1257 ± 282  | -17.5 ± 0.2         | -20 ± 2 |
| <b>Day 1</b> | 682 ± 163                  | 1417 ± 121  | -16 ± 4             | -20 ± 3 |
| <b>Day 2</b> | 657 ± 147                  | 1566 ± 352  | -11 ± 3             | -10 ± 2 |
| <b>Day 3</b> | 762 ± 161                  | 1371 ± 570  | -12 ± 4             | -11 ± 2 |
| <b>Day 4</b> | 2080 ± 322                 | 3578 ± 368  | -9 ± 5              | -8 ± 1  |
| <b>Day 5</b> | 752 ± 93                   | 3035 ± 1984 | -12 ± 2             | -11 ± 2 |

## References

- 1 G. V. Lowry, R. J. Hill, S. Harper, A. F. Rawle, C. O. Hendren, F. Klaessig, U. Nobbmann, P. Sayre and J. Rumble, *Environmental Science: Nano*, 2016, **3**, 953–965.
- 2 M. J. Atkinson and C. Bingman, *Journal of Aquaculture and Aquatic Sciences*, 1997, **8**, 39–43.
